# Supplementary material
Source: PubMed Central journal article supplement (PMC2777928)
Supplement: E09-01-0037_1.pdf [file E09-01-0037_1.pdf]

Table S1. *P. pastoris* strains used in supplementary data

| Name   | Genotype                                                                          | Reference                   |
|--------|-----------------------------------------------------------------------------------|-----------------------------|
| SCM143 | <i>his4, pep4, prb1 Δpex13 (Zeo<sup>R</sup>) P<sub>GAPDH</sub>-GFP-SKL (HIS4)</i> | This study                  |
| SCM147 | <i>his4, arg4, P<sub>GAPDH</sub>-GFP-SKL (HIS4)</i>                               | This study                  |
| SCM149 | <i>his4, pep4, prb1 Δpex13 (Zeo<sup>R</sup>) P<sub>PEX8</sub>-GFP-SKL (HIS4)</i>  | This study                  |
| SCM151 | <i>his4, arg4, P<sub>PEX8</sub>-GFP-SKL (HIS4)</i>                                | This study                  |
| SCM153 | <i>his4, pep4, prb1 Δpex13 (Zeo<sup>R</sup>) P<sub>AOXI</sub>-GFP-SKL (HIS4)</i>  | This study                  |
| SLZ40  | <i>his4, arg4, P<sub>PEX8</sub>-GFP-Pex8 (HIS4)</i>                               | Zhang <i>et al.</i> (2006)  |
| SLZ46  | <i>his4, arg4, Δpex14 (ARG4) P<sub>PEX8</sub>-GFP-Pex8 (HIS4)</i>                 | Zhang <i>et al.</i> (2006)  |
| STW1   | <i>his4, arg4, P<sub>AOXI</sub>-GFP-SKL (HIS4)</i>                                | Wiemer <i>et al.</i> (1996) |

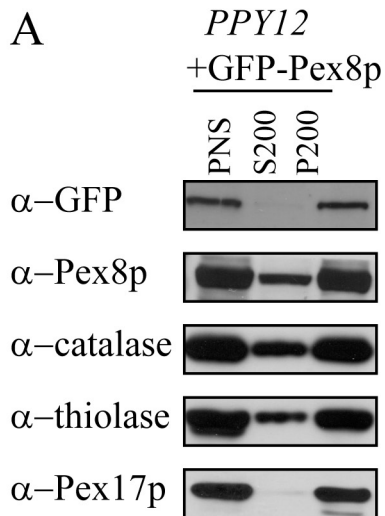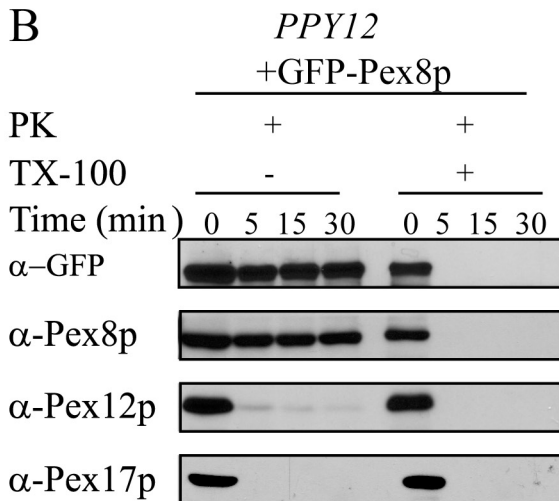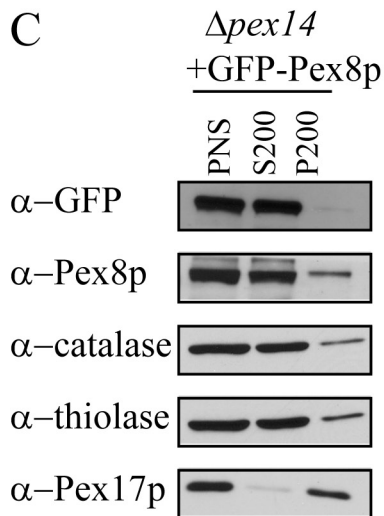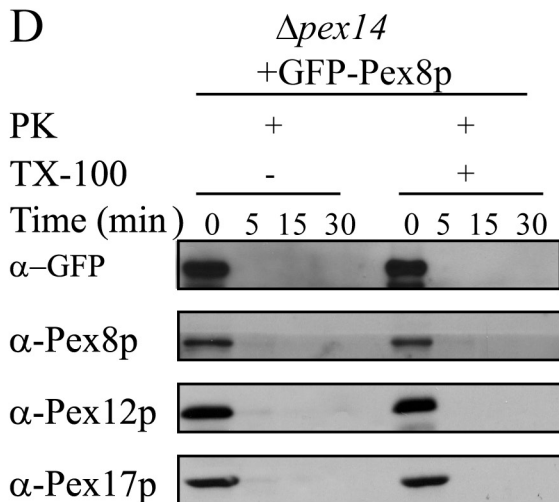

Figure S1

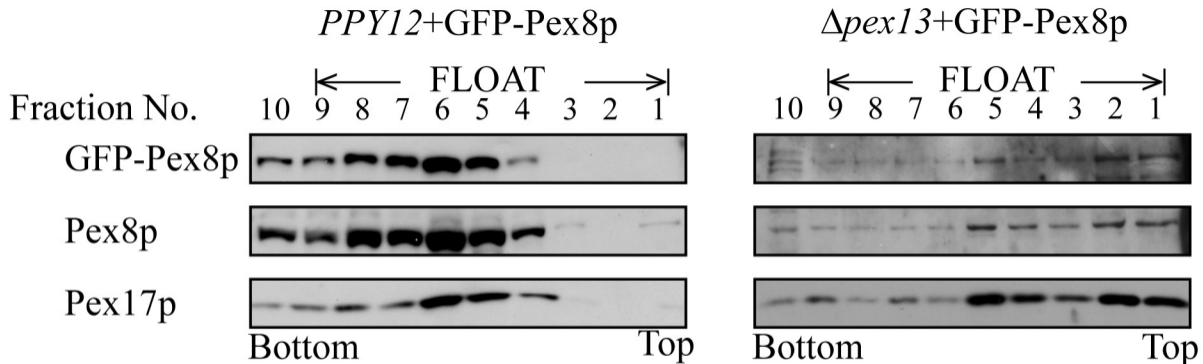

Figure S2

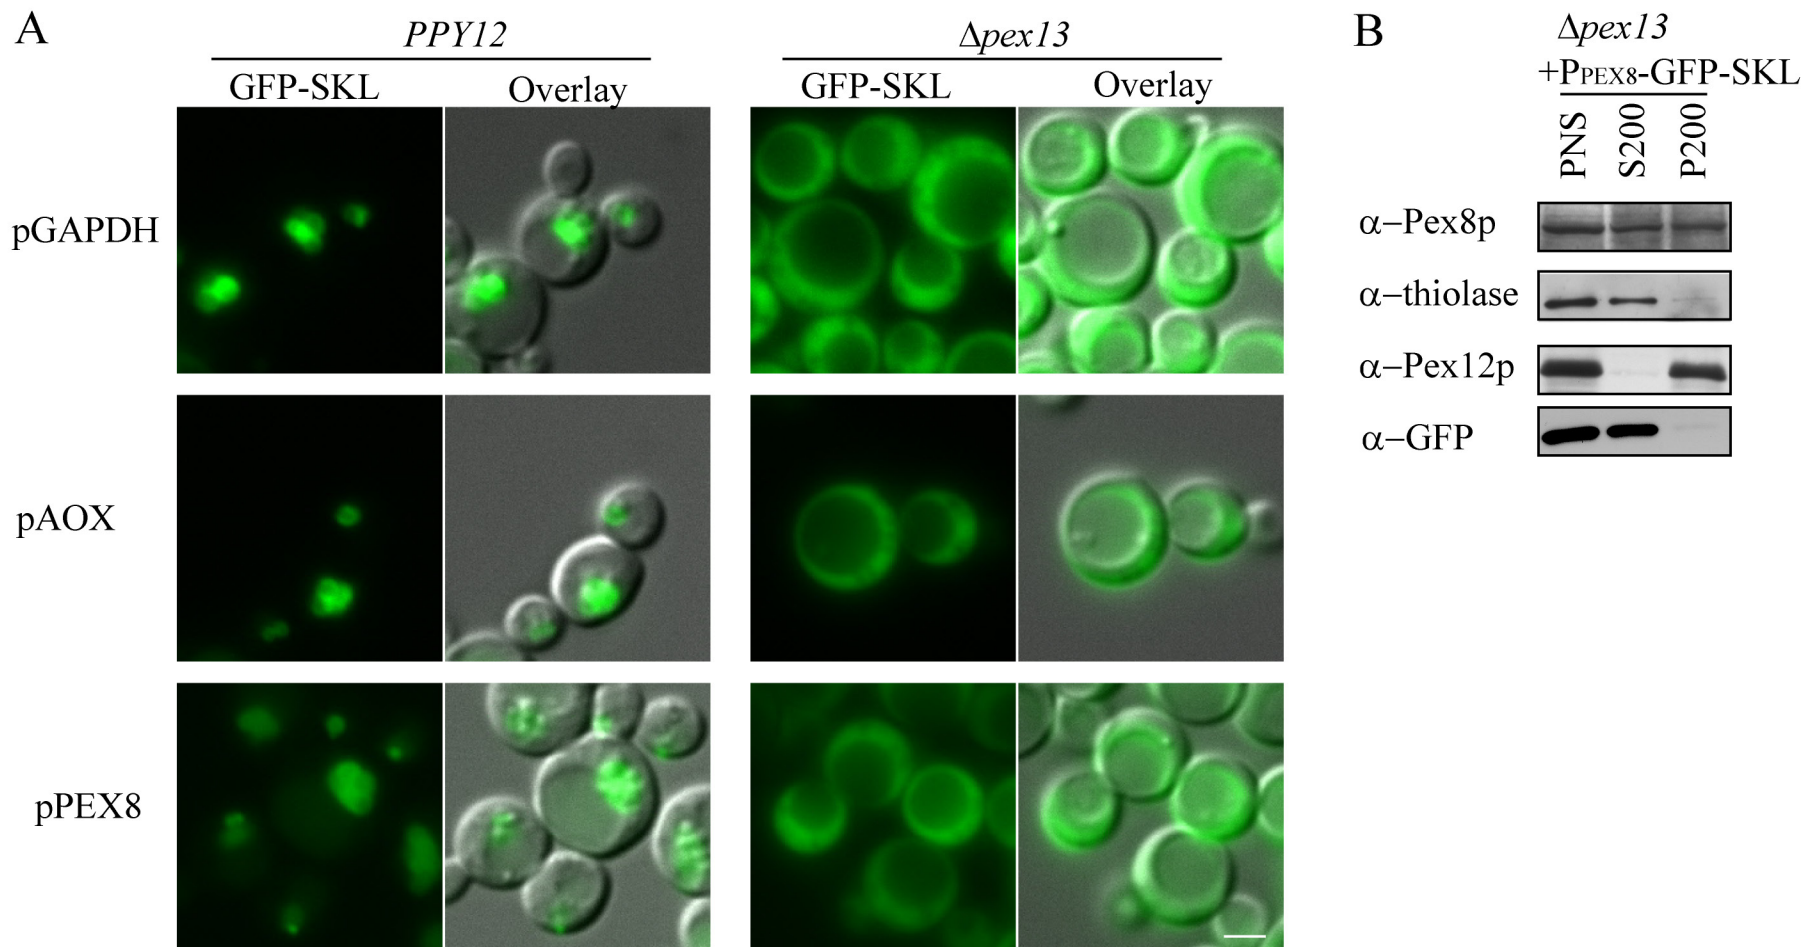

Figure S3
